# Supplementary material
Source: PubMed Central journal article supplement (PMC5630508)

## Supplementary Information

### The inositol pyrophosphate synthesis pathway in *Trypanosoma brucei* is linked to polyphosphate synthesis in acidocalcisomes

Ciro D. Cordeiro<sup>1</sup>, Adolfo Saiardi<sup>2</sup>, and Roberto Docampo<sup>1,#</sup>

<sup>1</sup>Center for Tropical and Emerging Global Diseases and Department of Cellular Biology,  
University of Georgia, Athens, Georgia, 30602, USA

<sup>2</sup>Medical Research Council Laboratory for Molecular Cell Biology, University College  
London, WC1E 6BT, Gower Street, London, United Kingdom

Running title: Inositol pyrophosphates in *T. brucei*

#Corresponding author: [rdocampo@uga.edu](mailto:rdocampo@uga.edu), Tel +1-706-542-8104; FAX: +1-706-542-9493

Table S1

Table S2

Figure S1

**Table S1.** Soluble inositol phosphate kinases identified in the human genome and orthologs from *S. cerevisiae* and *T. brucei*. Listed below the enzyme definition is the primary, but not exclusive, enzymatic reaction.

| <b>Inositol phosphate kinase</b>                                                                                      | <i>H. sapiens</i><br>Gene ID                | <i>S. cerevisiae</i><br>SGD | <i>T. brucei</i><br>TriTrypDB      |
|-----------------------------------------------------------------------------------------------------------------------|---------------------------------------------|-----------------------------|------------------------------------|
| <b>Inositol-trisphosphate 3-kinase</b><br>I(1,4,5)P <sub>3</sub> => I(1,3,4,5)P <sub>4</sub>                          | <b>ITPKA,B,C</b><br>3706<br>3707<br>80271   |                             |                                    |
| <b>Inositol polyphosphate multikinase</b><br>I(1,4,5)P <sub>3</sub> => IP <sub>4</sub> => I(1,3,4,5,6)P <sub>5</sub>  | <b>IPMK</b><br>253430                       | <b>Arg82</b><br>YDR173C     | <b>TbIPMK</b><br>Tb427tmp.211.3460 |
| <b>Inositol-tetrakisphosphate 1-kinase</b><br>I(1,3,4)P <sub>3</sub> => IP <sub>4</sub> => I(1,3,4,5,6)P <sub>5</sub> | <b>ITPK1</b><br>3705                        |                             |                                    |
| <b>Inositol pentakisphosphate 2-kinase</b><br>I(1,3,4,5,6)P <sub>5</sub> => IP <sub>6</sub>                           | <b>IPPK</b><br>64768                        | <b>Ipk1</b><br>YDR315C      | <b>TbIP5K</b><br>Tb427.04.1050     |
| <b>Inositol hexakisphosphate kinase</b><br>IP <sub>6</sub> => 5PP-IP <sub>5</sub>                                     | <b>IP6K1,2,3</b><br>9807<br>51447<br>117283 | <b>Kcs1</b><br>YDR017C      | <b>TbIP6K</b><br>Tb427.07.4400     |
| <b>Diphosphoinositol pentakisphosphate kinase</b><br>5PP-IP <sub>5</sub> => PP <sub>2</sub> -IP <sub>4</sub>          | <b>PPIP5K1,2</b><br>9677<br>23262           | <b>Vip1</b><br>YLR410W      |                                    |

**Table S2.** *S. cerevisiae* strains, plasmids and primers used in this study.

| Strain            | Genotype                                                                                                                    | Source                                                           |
|-------------------|-----------------------------------------------------------------------------------------------------------------------------|------------------------------------------------------------------|
| DDY1810           | <i>MATa leu2-3,112 trp1-Δ901 ura3-52 prb1-1122 pep4-3 prc1-407</i>                                                          | [1]                                                              |
| <i>kcs1Δ</i>      | DDY1810 <i>kcs1::Leu2</i>                                                                                                   | [1]                                                              |
| <i>ipk1Δ</i>      | DDY1810 <i>ipk1::Leu2</i>                                                                                                   | this study                                                       |
| <i>arg82Δ</i>     | DDY1810 <i>arg82::Leu2</i>                                                                                                  | this study                                                       |
| BY4741            | <i>MATa his3Δ1 leu2Δ0 met15Δ0 ura3Δ0</i>                                                                                    | [2]                                                              |
| <i>Ipk1Δkcs1Δ</i> | BY4741 <i>ipk1::kanMX4 kcs1::kanMX4</i>                                                                                     | [2]                                                              |
| Plasmids          |                                                                                                                             | Source                                                           |
| pET-32 Ek/LIC     |                                                                                                                             | Novagen                                                          |
| pADH:GST          |                                                                                                                             | [3]                                                              |
| pMOTag4H          |                                                                                                                             | [4]                                                              |
| pMOTag33M         |                                                                                                                             | [4]                                                              |
| Primer            | Sequence                                                                                                                    | Use                                                              |
| 1                 | GACGACGACAAGATGTTAAATATTTGCCAAAAC                                                                                           | (fwd); cloning of <i>TbIPMK</i> in pET32                         |
| 2                 | GAGGAGAAGCCCGTTCATGAAAGAAGAAAAATAAT<br>T                                                                                    | (rev); cloning of <i>TbIPMK</i> in pET32                         |
| 3                 | GACGACGACAAGATGTTGTCGGAAGAGGAGGCACG                                                                                         | (fwd); cloning of <i>TbIP5K</i> in pET32                         |
| 4                 | GAGGAGAAGCCCGTCTAACAATGGAAGTCAAGTTCG                                                                                        | (rev); cloning of <i>TbIP5K</i> in pET32                         |
| 5                 | GACGACGACAAGATGGGGGAAGAGGAGAATTTAC                                                                                          | (fwd); cloning of <i>TbIP6K</i> in pET32                         |
| 6                 | GAGGAGAAGCCCGTTCATGTGAGCATGTCAAGTACA                                                                                        | (rev); cloning of <i>TbIP6K</i> in pET32                         |
| 7                 | TCAGGTGACAGGCGGTTACACTTTCCTGAGGAGGTGGT<br>TGGGTTTGTTCAGGTTTGGAAAAAATTATTTTCTTCT<br>TTCAGGTACCGGGCCCCCCTCGAG                 | (fwd); tagging <i>TbIPMK</i> ; template<br>pMOTag4H              |
| 8                 | AAAAGAGAGTGAGATCGAATAAATATAAGACCCATG<br>TCATACTACCAAATTTAAACAACCGAAATACCGAAGA<br>TCGCCGTTCTCATGGCGGCCGCTCTAGAAGTAGTGGA<br>T | (rev); tagging <i>TbIPMK</i> ; template<br>pMOTag4H              |
| 9                 | CTGAGCCGCTATTTTGTGCTTGACCGTGAAGTCCTTGCA<br>GCGTGGGAGGATTATAAAGTTGTAAGCGCACCTGAGTT<br>CCATTGTGGTACCGGGCCCCCCTCGAG            | (fwd); tagging <i>TbIP5K</i> ; template<br>pMOTag4H or pMOTag33M |
| 10                | GATACACACAAACAAACAAACGAACGTTACGCAACTT<br>CGTCTCACATGGACTAAACCTAAAGAGGTGATCACACC<br>CCCACAAAAGTGGCGGCCGCTCTAGAAGTAGTGAT      | (rev); tagging <i>TbIP5K</i> ; template<br>pMOTag4H or pMOTag33M |
| 11                | AGCTGCTACGAGGTGGCGATGCAGACGCGGAACAGGA<br>TAAGGACGTGGGATATATTGAGGCCCTGAAAAGTAGTAC<br>TTGACATGCTCACAGGTACCGGGCCCCCCTCGAG      | (fwd); tagging <i>TbIP6K</i> ; template<br>pMOTag4H              |
| 12                | TCCCGCACAAAACCTCTGCTGCTTATGCTCCATTTCATGCG<br>TCCTGAAACGAACGTCGCGATCATTGGGAAGACACA<br>CTGTTGAAGGTATGGCGGCCGCTCTAGAAGTAGTGAT  | (rev); tagging <i>TbIP6K</i> ; template<br>pMOTag4H              |
| 13                | ACGCGTCGACAATGTAAATATTTGCCAAAACCTGTCTT<br>CCGTTG                                                                            | (fwd); cloning of <i>TbIPMK</i> in<br>pADH:GST                   |
| 14                | ATAAGAATGCGGCCGCTCATGAAAGAAGAAAAATAATT<br>TTTTCAAACCTTGAAC                                                                  | (rev); cloning of <i>TbIPMK</i> in<br>pADH:GST                   |
| 15                | ACGCGTCGACAATGCGCTTCCTCGGTGC                                                                                                | (fwd); cloning of <i>TbIP5K</i> in<br>pADH:GST                   |

|    |                                                                             |                                                |
|----|-----------------------------------------------------------------------------|------------------------------------------------|
| 16 | ATAAGAATGCGGCCGCTAACAAATGGA ACTCAGGTGCG<br>C                                | (rev); cloning of <i>TbIP5K</i> in<br>pADH:GST |
| 17 | ACGCGTCGACAATGGGGGAAGAGGAGAATTTACGTAG<br>AA                                 | (fwd); cloning of <i>TbIP6K</i> in<br>pADH:GST |
| 18 | ATAAGAATGCGGCCGCTTATGTGAGCATGTCAAGTACA<br>GTTTTCAGG                         | (rev); cloning of <i>TbIP6K</i> in<br>pADH:GST |
| 19 | ACATGGATATGTGCATACGTGTGCCTAAGTAGAAATTT<br>TTTTCACATGCAGCTGAAGCTTCGTACGC3    | (fwd); generation of <i>arg82Δ</i>             |
| 20 | TGTACCATATAACCATAAACAAGGTAAACTTCACCTCTC<br>AATATATCTAGCATAGGCCACTAGTGGTACTG | (rev); generation of <i>arg82Δ</i>             |
| 21 | TCGAAAATTGTCAGAGATAAGTTCCTTTTTTGAAAAGA<br>AAGATCGATGCAGCTGAAGCTTCGTACGC3    | (fwd); generation of <i>ipk1Δ</i>              |
| 22 | TATGTGCATCTGCCAGTACCAAAGGTGGAAAGAAAAGT<br>ATACAGTTTAGCATAGGCCACTAGTGGTACTG  | (rev); generation of <i>ipk1Δ</i>              |
| 23 | TGACTTCTCTCGCTCAGGTG                                                        | (fwd); qRT-PCR <i>TbIPMK</i>                   |
| 24 | TCATGAAAGAAGAAAAATAATTTTTTCCAAACC                                           | (rev); qRT-PCR <i>TbIPMK</i>                   |
| 25 | GTATAGCGTGTGGATTGGCGG                                                       | (fwd); qRT-PCR <i>Actin</i>                    |
| 26 | TGCTGTGTACGATGCTGGG                                                         | (rev); qRT-PCR <i>Actin</i>                    |

## References

1. Onnebo SM, Saiardi A. Inositol pyrophosphates modulate hydrogen peroxide signalling. *Biochem J.* 2009; 423(1):109-18.
2. Saiardi A, Sciambi C, Mccaffery JM, Wendland B, Snyder SH. Inositol pyrophosphates regulate endocytic trafficking. *Proc Natl Acad Sci USA.* 2002; 99(22):14206-11.
3. Azevedo C, Burton A, Ruiz-Mateos E, Marsh M, Saiardi A. Inositol pyrophosphate mediated pyrophosphorylation of AP3B1 regulates HIV-1 Gag release. *Proc Natl Acad Sci USA.* 2009; 106(50):21161-6.
4. Oberholzer M, Morand S, Kunz S, Seebeck T. A vector series for rapid PCR-mediated C-terminal in situ tagging of *Trypanosoma brucei* genes. *Mol Biochem Parasitol.* 2006; 145(1):117-20.

## Figure Legend

Figure S1. *TbIPMK* conditional KO does not change labeling or distribution of acidocalcisomes. Immunofluorescence of *TbIPMK* conditional KO with (A) or without (B) tetracycline shows acidocalcisome marker *TbVp1* (green) and DAPI-stained DNA (blue) in four different cells for each condition. The Zen software was used to combine all super-resolution Z-stacks into a single projection. Bar = 5 μm.

Figure S1

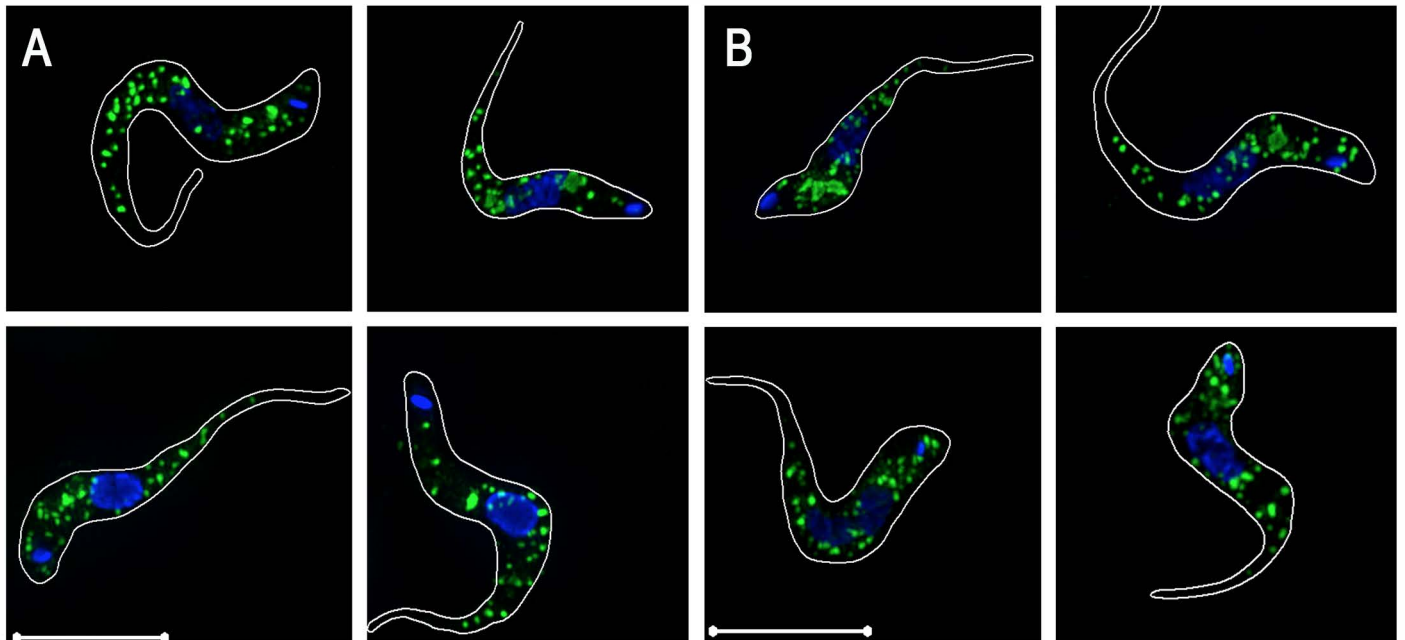

Supplement: NIHMS900059-supplement-Supp_info.pdf [file NIHMS900059-supplement-Supp_info.pdf]
